# Supplementary material for: Gaussian Mixture Models for the Optimal Sparse Sampling of Offshore Wind Resource
Source: Copernicus journal article supplement (doi:10.5194/wes-2022-39), 2022-06-02
Supplement: Supplementary file [file wes-2022-39-RC1-supplement.pdf]

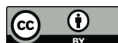

# Gaussian Mixture Models for the Optimal Sparse Sampling of Offshore Wind Resource

Robin Marcille<sup>1,2</sup>, Maxime Thiébaud<sup>1</sup>, Pierre Tandeo<sup>2</sup>, and Jean-François Filipot<sup>1</sup>

<sup>1</sup>France Énergies Marines, Technopôle Brest-Iroise, 525 Avenue Alexis de Rochon, 29280 Plouzané, France

<sup>2</sup>IMT Atlantique, Lab-STICC, UMR CNRS 6285, 29238 Plouzané, France

**Correspondence:** Robin Marcille (robin.marcille@france-energies-marines.org)

**Abstract.** Offshore wind resource assessment is a crucial step for the development of offshore wind energy. It relies on the installation of measurement devices, which placement is an open challenge for developers. In this paper, a sparse sampling method using a Gaussian Mixture Model on Numerical Weather Prediction data is developed for the offshore wind reconstruction. It is applied on France's main offshore wind energy development areas, Normandy, Southern Brittany, and the Mediterranean Sea. The study is based on 3 years of Meteo France AROME's data, available through the MeteoNet data-set. Using a Gaussian Mixture Model for data clustering, it yields to optimal sensors' locations with regards to wind field reconstruction error. The proposed workflow is described and compared to state-of-the-art methods for sparse sampling. It constitutes a robust yet simple method for the definition of optimal sensor siting for offshore wind reconstruction. The described method yields to optimal network of 7, 4, and 4 sensors for Normandy, Southern Brittany and the Mediterranean Sea with a gain of approximately 20% in wind field reconstruction error compared to the median Monte Carlo case, and more than 30% compared to state-of-the-art methods.

## 1 Introduction

The IPCC sixth assessment report utters the urgent need for strong and sustained action on global greenhouse gas emissions reduction to stay within 1.5°C of global warming. The working group III focusing on climate change mitigation places renewable energy as one of the main solutions for the decarbonation of the global energy production (Shukla et al., 2022). As a mature and cost-effective electricity source, offshore wind energy will then play a key role in the next decades. In terms of renewable energies, France is off track in its commitments set for 2023 by the multi-annual energy planning law (PPE). It targets 73.5GW of installed capacity of renewable energies, an increase of 51% compared to 2017 levels (PPE, 2020). By the end of 2021, the total installed capacity was of 59.8 GW, with a still insufficient annual rate of installation of 4 GW (RTE, 2021). With 11 million km<sup>2</sup> of territorial waters under French jurisdiction and 20,000 km of coastline, France has an extensive and windy seafront. It benefits from the second largest offshore wind potential in Europe, after the United Kingdom with up to 80 GW of foundation-based offshore wind and 140 GW of floating offshore wind that could be exploited according to IEA (2019). Offshore wind can then be a leading sector for the development of renewable energies in France. The french road-map currently



plans 1 GW of tender per year from 2024 onwards for fixed and floating wind farms. This was confirmed and reinforced in  
25 early 2022, with 40 GW of installed capacity envisioned by 2050.

During the development phase of a wind project, the wind resource assessment is a key step to determine its financial feasibility. It can be carried out with numerical weather prediction (NWP) hindcast data such as WRF (Weather Research and Forecasting model) data. However, field observations are necessary to estimate the uncertainties of the models and to assess higher resolution wind dynamics (Murthy and Rahi, 2017).

30 Floating **LiDARs** are certified devices for **w**ind resource assessment. They are LiDAR units integrated onto a standalone floating structure. These wind sensors offer the potential for reduced costs compared to meteorological masts, **especially offshore** (Gottschall et al., 2017). These sensors can be expensive to install and require regular maintenance. **Their number and siting thus need to be optimized in order to compose** an optimal **sensors network**. Such **network is** expected to capture most of the dominant wind dynamics from a minimum number of sensors.

35 Numerous efforts have been undertaken in different scientific fields to optimize sparse **sensors** siting, a **combinatory** problem not solvable by **convex optimization**. For example, Manohar et al. (2018) proposed a data-driven method based on a **QR** pivoting greedy algorithm on a reduced basis to determine optimal **sensors placements** for face recognition, global sea surface temperature and flow reconstruction around a cylinder. The QR pivoting method decomposes a matrix into an orthogonal matrix and an upper triangular matrix using columns pivot. By iteratively selecting the column with the highest two-norm  
40 as pivot, this algorithm for QR factorization is suited for the selection of salient points. In Clark et al. (2020), the QR-pivot decomposition is modified to include cost constraints and is applied on the three same data-sets.

In the field of geoscience, Yildirim et al. (2009) employed simulation results from different regional ocean models to define an efficient sensor placement. The authors used the Empirical Orthogonal Functions (EOF) technique to determine the spatial modes of different simulated ocean dynamics systems. The extrema of the EOF spatial modes were found to be good locations  
45 for **sensors** placement and accurate field reconstruction. Zhang and Bellingham (2008) added to the **EOFs** extrema method a constraint on the cross products of EOFs to select the sensors' locations, and applied it to Pacific sea surface temperature reconstruction. Using the same kind of constrained EOFs analysis, Castillo and Messina (2019) proposed a data-driven framework based on a Proper Orthogonal Decomposition **to** determine the optimal locations for power system oscillation monitoring and state reconstruction. In this study they selected iteratively the locations with highest POD amplitude and lowest cross coupling  
50 between the modes. In Yang et al. (2010), the **EOFs** extrema are used for ocean dynamics reconstruction, introducing an exclusion volume to avoid redundancy, account for gappy data and for uncertainty.

Recent studies proposed innovative methods to improve the capabilities of sparse sampling. In Mohren et al. (2018), the authors took inspiration from **insects** neural activation during flights to derive a sparse sampling method in complex flows to create an encoder for flight mode classification including both the spatial and temporal dependencies of the data. **To improve the**  
55 **performance of the reconstruction**, Chepuri and Leus (2014) proposed a method for grid augmentation to allow for continuous **sensor placement, off-grid sensor selection and convex optimization problem formulation**. In Fukami et al. (2021), the use of Voronoi tessellation, a method to optimally partition the space into  $n$  cells given  $n$  input points using a distance measure  $d$ ,



helps creating a viable input for CNN super-resolution from sparse sensors. This reconstruction technique is then tested on sea surface temperature reconstruction and 3D turbulence.

60 The problematic of optimal sensors placement has also been investigated for offshore wind energy measurements applications. Annoni et al. (2018) developed a sparse-sensing algorithm to determine the optimal locations of sensors to improve the overall estimation precision of the flow field within a wind farm. At even finer scales, Ali et al. (2021) uses low-dimensional classifiers to obtain sensors' locations for the deep learning reconstruction of wind turbine wakes. However, to the best of our knowledge, it was not applied at the regional scale for wind energy resource assessment.

65 The objective of the present study is twofold and the associated problematic is formulated as the following - for conducting offshore wind resource assessment of any targeted area:

1. What is the optimal (i.e., sufficient) number of offshore wind sensors to be deployed?
2. What is the optimal location of each wind sensor?

The methodology developed to address the problematic is based on the clustering of the EOF coefficients calculated from three years (2016-18) of hourly 10-meters wind output of the NWP model AROME (Application of Research to Operations at Mesoscale) (Seity et al., 2011). On the reduced basis computed from 2 years of training data, a Gaussian Mixture Model (GMM), an ensemble of multivariate Gaussian distributions, is fitted to cluster the data in an unsupervised framework. The obtained clusters' centroids are then chosen as sensors' locations. The reconstruction capabilities of the derived sensors network are compared to those of common state-of-the-art methods (EOFs extrema and QR pivoting), and randomly selected sensors network. Three areas associated with the French offshore wind development are investigated: Normandy, Southern Brittany and the Gulf of Lion in the Mediterranean Sea. An optimal wind sensors network is proposed for each area, to help for the development of offshore wind energy in France.

## 2 Data

### 2.1 Study areas

80 The three areas investigated in this study are located off the coast Normandy, off the coast of Southern Brittany and in the Mediterranean sea, three major development areas for offshore wind in France with numerous planned offshore projects, listed in Table 1.

With water depth not exceeding 50 m (Fig. 1), the area located off the coast of Normandy area is particularly suitable for the deployment of fixed offshore wind farms. Current projects will be installed off the coast of Fécamp, Courseulles-sur-Mer and Dieppe - Le Tréport (Fig. 1). The total capacity of each wind farms will be 450-500 MW with a starting date of commissioning expected in 2023-24 (Table 1). In addition, the French Government has recently announced a new project of a wind farm located 32 km off the coast of Normandy (Fig. 1). This future wind farm will generate 1 GW. The starting date of commissioning is expected by 2028.



**Table 1.** Characteristics of the foundation-based (Normandy) and floating (Southern Brittany, Mediterranean sea) future wind farms planned for the next decade on the study areas (CEREMA, 2022).

| Areas             | Wind Farm                              | Index in Fig. 1 | Capacity (MW) | Number of wind turbines | Date of commissioning |
|-------------------|----------------------------------------|-----------------|---------------|-------------------------|-----------------------|
| Normandy          | Dieppe- Le Tréport                     | 1               | 496           | 62                      | 2024                  |
|                   | Fécamp                                 | 2               | 497           | 71                      | 2023                  |
|                   | Courseulles-sur-mer                    | 3               | 448           | 64                      | 2024                  |
|                   | AO4 call for tender                    | 4               | 1 000         | N/A                     | 2028-29               |
| Southern Brittany | Groix-Belle-Ile                        | 5               | 28.5          | 3                       | 2022-23               |
|                   | AO5 call for tender                    | 6               | 250           | N/A                     | 2028-2029             |
| Med. sea          | Faraman -<br>Port-Saint-Louis-du-Rhône | 7               | 24            | 3                       | 2022                  |
|                   | Gruissan                               | 8               | 30            | 3                       | 2022                  |
|                   | Leucate - Le Barcarès                  | 9               | 30            | 3                       | 2022                  |
|                   | AO6 call for tender                    | 10 and 11       | 2 x 250       | N/A                     | 2028-2029             |

The area off the coast of Brittany is endowed with water depth up to 100 m which make it a very favourable area for the development of floating wind farms. A pilot floating wind farm is planned off Groix-Belle Ile, to be commissioned in 2023. Furthermore, the French Government aims at developing another 250MW of floating wind energy in the area (Fig. 1).

Because of its very favorable and regular wind regimes and deep bathymetry, the Mediterranean Sea has significant wind potential for floating wind energy. This led to the development of three pilot floating wind farm projects (Leucate, Gruissan and Provence Grand Large) in the gulf of Lion. These projects will rely on 3 full scale 8-10 MW floating turbines, whose generated power will be injected in the French power grid by 2022-2023 (Table 1). In addition, two commercial wind farms with power capacity over 250 MW each will be in operation by 2029.

## 2.2 The MeteoNet data-set

MeteoNet is a meteorological data-set developed and made available by Meteo-France (Larvor et al., 2020), the French national meteorological service. The data-set contains full time series of satellite and radar images, NWP models and ground observations. The data covers two geographic areas of 550km x 550km on the Mediterranean and Brittany coasts (Fig. 1), and spans from 2016 to 2018. Hourly 10-meter wind output of the high resolution NWP model AROME are available. AROME is operational at Meteo-France since December 2008. It was designed to improve short range forecasts of severe events such as intense Mediterranean precipitations, severe storms, fog or urban heat during heat waves. The physical parametrisations of the model come mostly from the Méso-NH research model whereas the dynamic core comes from the Non-Hydrostratic model ALADIN (Termonia et al., 2018). The size of the AROME grid is 1.3 km. The model is initialized from data assimilation derived from the ARPEGE-IFS variational assimilation system (Courtier et al., 1994) and adapted to the AROME finer resolution.

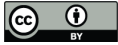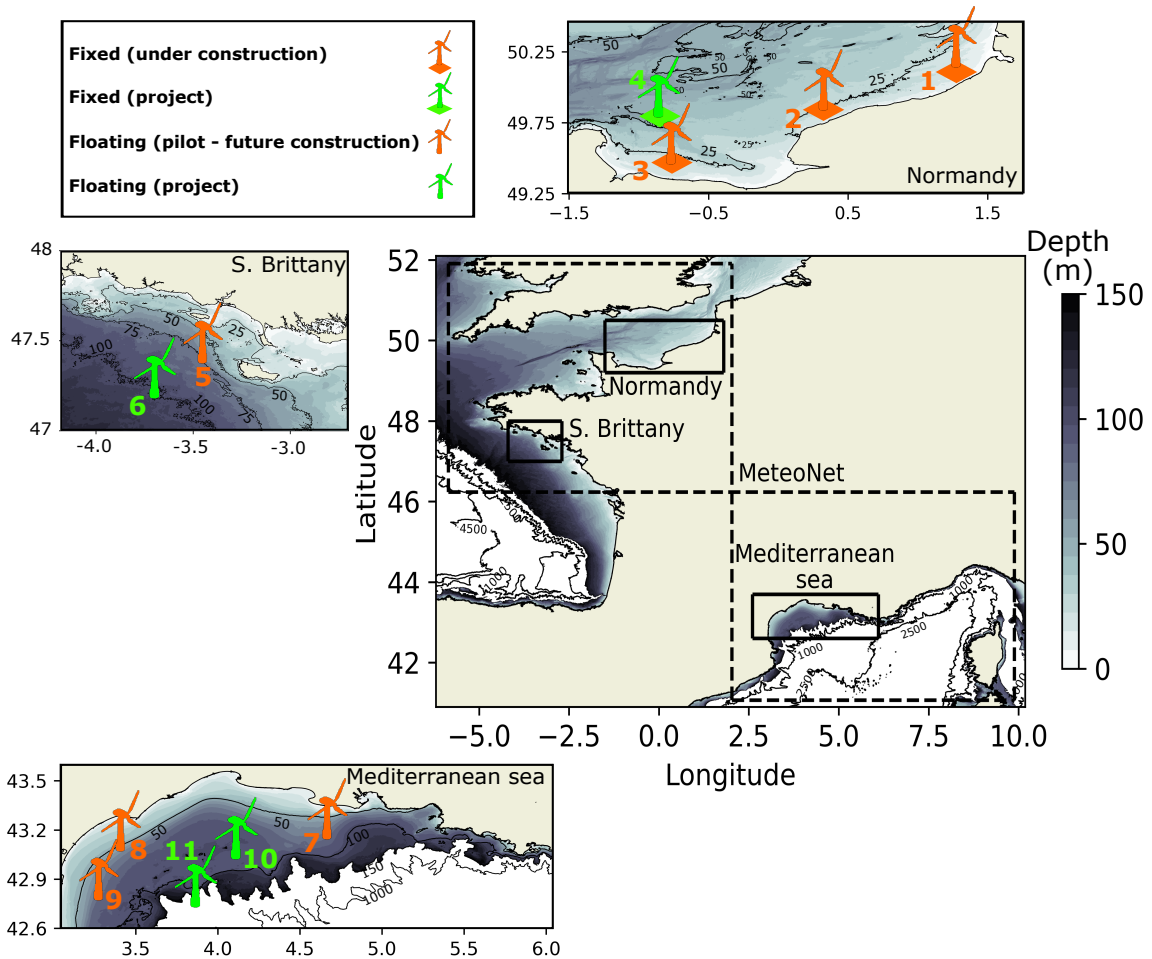

**Figure 1.** Overview of the French coasts with the bathymetry. The color shading shows the water depth until 150 m. Areas with water depth exceeding 150 m are shown in white. Black contours are used to identified depth of 1000m, 2500 m and 4500 m. The three study areas are shown by black rectangles. Each area is presented on different panels where the locations of the future foundation-based and floating wind farms are shown with their different stages of development. On the main panel, the dashed black lines delimits the areas covered by the MeteoNet data-set.

For each area of interest, the 10-meter zonal ( $u$ ) and meridional ( $v$ ) wind speed were extracted from AROME. The open-source MeteoNet data-set only contains surface parameters, justifying the choice of 10-meters wind speed for the study. Since the focus is on offshore wind, grid points at land were excluded from the analysis. The characteristics of each area are then the following:

- Normandy: 4272 grid points ( $\sim 7\,000\text{ km}^2$ ).
- Southern Brittany: 1837 grid points ( $\sim 3\,000\text{ km}^2$ ).

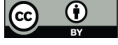

– Mediterranean sea: 3571 grid points ( $\sim 5\,800\text{ km}^2$ ).

115 A total of 65 days ( $\sim 6\%$ ) of the 3-year data-set are unusable. The days identified as erroneous are similar for each area and were removed from the analysis.

### 3 Methods

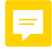

The problem tackled in this paper is the finding of an optimal network of sensors to reconstruct the offshore wind field. It uses NWP gridded data of zonal and meridional wind above the study areas. The finding of  $D$  input points from  $K$  grid points consists in a combinatory problem of non-convex optimization.

120 In all that follows, the NWP wind field over the study area  $\mathbf{X}(t) \in \mathbb{R}^{2K}$  is the concatenation of the bi-dimensional wind speed at the  $K$  grid-points of the model. The target is then expressed as the concatenation of reduced basis of  $r$  components for zonal and meridional wind speed. This target is to be reconstructed from a limited number of measurements  $\mathbf{Y}(t) \in \mathbb{R}^D$ . The methods described in this section try to define a set of input grid points locations  $[\gamma_1, \dots, \gamma_D] \in [1, K]^D$  so that the wind field reconstructed from  $\mathbf{Y}(t)$  best fits the target state of the system  $\mathbf{X}(t)$ .

#### 125 3.1 Problem statement

Let's consider a system described by its time-varying state  $\mathbf{X}(t)$  that evolves according to unknown non-linear dynamics. It can be described on an orthogonal basis  $\{\Phi_p\}$  as:

$$\mathbf{X}(t) = \sum_{p=1}^P \mathbf{a}_p(t) \phi_p \quad (1)$$

130 To reduce the complexity of the model, the state of the system can be approximated using the first  $r$  modes. The number of modes to use can be chosen using a threshold on the total variance of the data-set such as:

$$\mathbf{X}(t) \approx \sum_{p=1}^r \mathbf{a}_p(t) \phi_p = \mathbf{X}^r \quad (2)$$

Leading to :

$$\mathbf{X}^r = \Phi^r \mathbf{a} \quad (3)$$

135 Where  $\Phi^r$  is the reduced basis,  $r$  is the number of modes kept for approximation, and  $\mathbf{a}_p \in \mathbb{R}^r$  are the time varying coefficients of the system's state on the reduced basis. The time index is omitted for simplicity.

The given system is then sampled according to a sampling matrix  $\mathbf{C} \in \mathbb{R}^{D \times K}$  that extracts  $D$  input points out of  $K$  points from the grid. The sampling matrix is composed of lines of zero with ones at the sensors' locations. Given a set of locations  $\gamma = [\gamma_1, \dots, \gamma_D] \in [1, K]^D$ ,  $\gamma_i \neq \gamma_j$ , and the associated canonical basis vectors  $\mathbf{e}_{\gamma_i} = (\delta_{\gamma_i, k}) \in \mathbb{R}^K$ , the sampling matrix is:

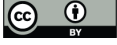

$$\mathbf{C}_\gamma = \begin{bmatrix} \mathbf{e}_{\gamma_1} & \mathbf{e}_{\gamma_2} & \cdots & \mathbf{e}_{\gamma_D} \end{bmatrix}^T \quad (4)$$

140 The measured matrix containing the wind speeds measured at the locations defined in the  $\mathbf{C}_\gamma$  matrix is then obtained by multiplying the full state by the sampling matrix. This measurements can then be approximated using the first  $r$  modes of the system:

$$\mathbf{Y} = \mathbf{C}_\gamma \mathbf{X} \approx \mathbf{C}_\gamma \Phi^r \mathbf{a} \quad (5)$$

145 From the measurement matrix, the full state is reconstructed using the reduced basis coefficients  $\mathbf{a}$  that can be obtained with the Moore-Penrose pseudo inverse of the  $\mathbf{C}_\gamma \Phi^r$  matrix, noted  $(\mathbf{C}_\gamma \Phi^r)^\dagger$ .

$$\mathbf{a}_{recons} = \mathbf{Y} (\mathbf{C}_\gamma \Phi^r)^\dagger \quad (6)$$

This reconstruction  $\Phi^r \mathbf{a}_{recons}$  is then compared to the reconstruction **with perfect knowledge** on the reduced basis coefficients  $\Phi^r \mathbf{a}$ . Given a number of sensors  $D$ , the optimisation problem can then be stated as the minimization of the reconstruction error over all position combinations  $\gamma$  listed in the  $\mathbf{C}_\gamma$  sampling matrix:

$$150 \arg \min_{\gamma, D} \langle \|\Phi^r (\mathbf{C}_\gamma \Phi^r)^\dagger \mathbf{Y} - \Phi^r \mathbf{a}\|_2 \rangle \quad (7)$$

With  $\langle . \rangle$  being the temporal mean. The reconstruction error is computed with regards to the reduced basis itself. The search of the optimal sampling matrix  $\mathbf{C}_\gamma$  is a  $\binom{K}{D}$  problem, intractable for the dimensions of this problem.

For what follows, the  $\mathbf{Y}$  matrix is the concatenation of the zonal and meridional components of the wind speed on the  $K$  grid points as function of time.

### 155 3.2 Reduced order model

The reduced order model used to decrease the dimension of the input data is the Empirical Orthogonal Function analysis (EOF). Also known as Principal Component Analysis (PCA), it decomposes the data-set onto an orthogonal basis. Practically, it is linked to the singular value decomposition of a matrix  $\mathbf{X}$  such that:

$$\mathbf{X} = \mathbf{U} \Sigma \mathbf{V}^T \quad (8)$$

160 With  $\Sigma$  a diagonal matrix of positive  $\sigma_k$  singular values,  $\mathbf{U}$  a matrix whose columns are orthogonal, known as singular vectors, the vectors of the orthogonal basis, and  $\mathbf{V}$  the loading of the associated vectors.

The singular vectors are chosen iteratively as the orthogonal vectors on which the variance of the projected data is maximized. The diagonal elements of  $\Sigma$  are sorted per value, and are equal to the percentage of variance of the data-set explained by each principal components. The variance explained by the first  $r$  EOFs is then :

$$165 \frac{\sum_{i=1}^r \sigma_i^2}{\sum_j \sigma_j^2} \quad (9)$$



In the past few decades, EOF analyses were used to study spatio-temporal patterns of climate variability, such as the North Atlantic oscillation, the Antarctic Oscillation or the variability of the Atlantic thermohaline circulation (e.g., Davis (1976); Thompson and Wallace (2000); Hawkins and Sutton (2007); Moore et al. (2013)). EOF analysis projects the original climate data on an orthogonal basis derived by computing the eigenvectors of a spatially weighted anomaly covariance matrix. Therefore, EOFs of a space-time physical process can represent mutually orthogonal space patterns where the data variance is concentrated, with the first pattern being responsible for the largest part of the variance, the second for the largest part of the remaining variance, and so on. EOFs are then very useful for the data reduction of any complex data-set such as climate data. By projecting the original data onto a limited subset of relevant orthogonal vectors, it reduces the dimensionality of the system and helps explain the variance of the data. It is often at the origin of any method employed to determine the optimal sensors' locations for signal reconstruction.

The number of EOFs to use in the reduced order model can be set so that the variance explained by the reduced basis is above a certain threshold. In this work, the data points are strongly correlated spatially, hence a low number of EOFs is needed to describe the vast majority of the data-set variance. The number of EOFs was set to 10, both for the zonal and meridional components of wind so that the reduced basis explains more than 95% of the total variance for the 3 areas.

For what follows the  $\Phi^r$  reduced basis is the concatenation of the  $\Phi_u^{r/2}$  and  $\Phi_v^{r/2}$  reduced basis for zonal and meridional wind speed, with  $r = 20$ .

### 3.3 Baseline methods

The placement of  $D$  sorted sensors within an area composed of  $K$  grid points is prohibitively expensive even for small systems. Determining the optimal sensors' locations for signal reconstruction is still an open challenge that numerous studies have attempted to solve by different methods (e.g., Manohar et al. (2018); Castillo and Messina (2019); Yildirim et al. (2009); Annoni et al. (2018); Caselton and Zidek (1984); Krause et al. (2008); Joshi and Boyd (2008); Powell et al.). Three of these methods will serve as baseline of the present study

#### 3.3.1 Monte Carlo simulations

The first baseline consists in picking random sensors' locations. For each area, and for a number  $D$  of sensors ranging from 1 to 10, a hundred random combinations of locations  $\gamma \in P_D([1, K])$  are considered. For each  $\gamma$  combination of sensors' locations, the reconstruction error is computed. From this ensemble of simulations, statistics on the reconstruction error are computed.

The median Monte-Carlo scenario for each area and number of sensors is then considered a benchmark for the study. It also gives information about the spread in reconstruction error resulting from all possible combinations.

#### 3.3.2 Dominant spatial modes' extrema

In Yildirim et al. (2009), the extrema of the spatial dominant modes are found to be relevant locations if not optimal for the reconstruction of the flow field. Those points can be seen as salient points, that best characterize the spatial modes. It is then





intuitive to select those to reconstruct the full state from the reduced basis. How many extrema are chosen from each variable and mode is studied specifically in Cohen et al. (2003), it is empirical and thus case specific.

200 In the case study of Cohen et al. (2003), the EOF decomposition gives modes that are highly spatially correlated. Moreover, in this study, points nearby the coast are influenced by the orography and show strong variability. Hence, sorting the points per coefficient and selecting the  $N$  first ones will lead to the selection of neighboring points, and/or irrelevant coastal points for our performance metric.

205 The extrema are then chosen manually, as performed in Yildirim et al. (2009), from the visualisation of the first EOF for both zonal and meridional wind speed. For each parameter and EOF rank, the extrema are selected, and discarded if redundant (manual process). Then they are sorted per absolute value and per EOF number for the two parameters.

The selected input points from EOFs extrema for the Mediterranean Sea are shown in Fig. 2. From the first to the fourth EOF for zonal and meridional wind, the extrema are selected if they are not too redundant or close to the coast / border. This unsatisfactory workflow is a way to ensure minimum relevance for the obtained sensors array.

### 3.3.3 QR pivots

210 The QR decomposition of the reduced basis matrix  $\Phi^r$  is the finding of two matrix  $\mathbf{Q}$  orthogonal and  $\mathbf{R}$  triangular superior such as:

$$\Phi^r = \mathbf{QR} \quad (10)$$

215 The  $\mathbf{Q}$  and  $\mathbf{R}$  matrix are obtained using Gram-Schmidt process, which consists in iteratively removing each column's orthogonal projection onto a pivot column. The QR algorithm can be performed using column pivoting, i.e. at each iteration, the matrix  $\Phi^r$  is multiplied by a permutation matrix  $\mathbf{P}$  such that the column taken for pivoting has the maximum two-norm. The decomposition is then:

$$\Phi^r \mathbf{P}^T = \mathbf{QR} \quad (11)$$

The permutation matrix  $\mathbf{P}$  is constructed so that the diagonal elements of  $\mathbf{R}$  are decreasing. It is applied to the matrix of the reduced basis to identify pivot locations. It then contains the ranked index of sensors' locations to build the sampling matrix.

220 The QR pivots method is described in Manohar et al. (2018) as a simple yet efficient method for sparse sensors placement. It is used to determine model data driven sensors networks to reconstruct flow fields for the flow past a cylinder and the sea surface temperature retrieval, two situations that are analogous to the case study. It is even tuned to include costs constraints for the search of Pareto optimal sensors placement in Clark et al. (2020). For wind fields estimation, it was applied to Computational Fluid Dynamics data in Annoni et al. (2018) to best reconstruct the flow in a wind farm. All in all, it represents a simple yet competitive baseline method for spare sensor placement.

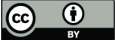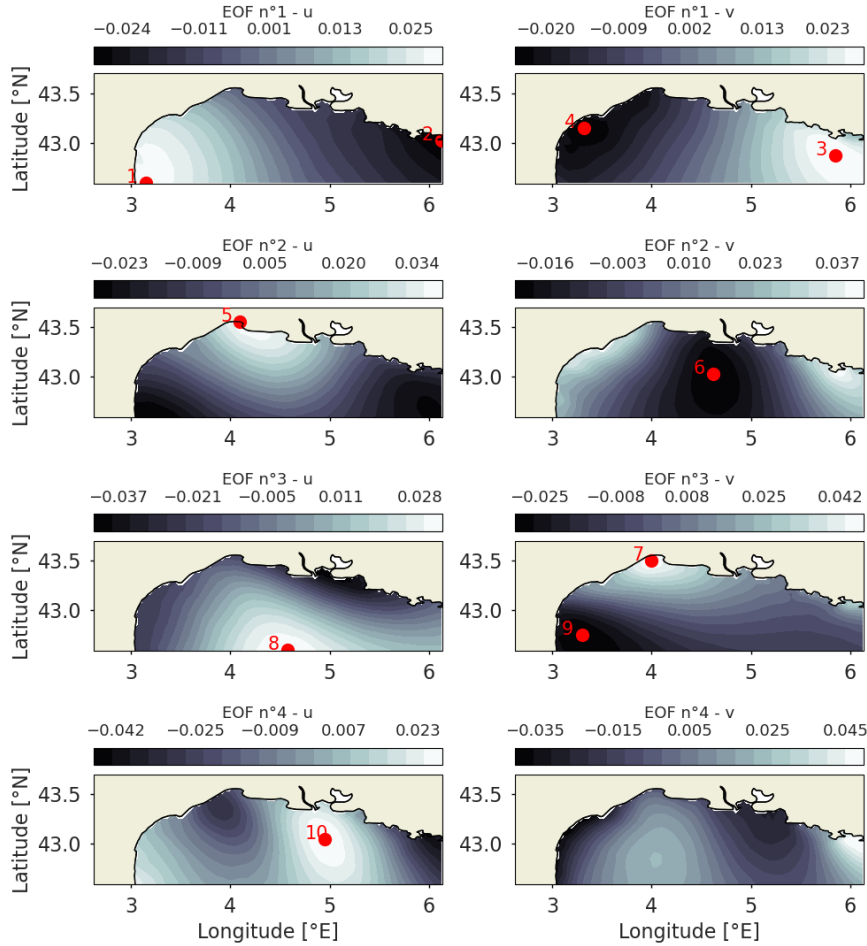

**Figure 2.** Selected sensors for the EOF extrema baseline in the Mediterranean Sea. The EOFs coefficients are displayed as background, and the selected salient points, and their associated ranks are displayed as red dots. The two columns are zonal ( $u$ ) and meridional ( $v$ ) wind speed, and the rows correspond to the EOF rank.

### 3.4 Gaussian Mixture Model clustering

A Gaussian mixture model (GMM) is a probabilistic model for representing normally distributed sub-populations within an overall population (Reynolds, 2009). GMM can be used in an unsupervised framework, allowing the model to select clusters automatically.

230 A GMM  $p$  is a weighted sum of  $M$  multivariate Gaussian distributions  $h$ :

$$p(\mathbf{x}) = \sum_{i=1}^M w_i h(\mathbf{x} | \mu_i, \Sigma_i) \quad (12)$$

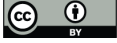

where the multivariate Gaussian distribution in a  $D$ -dimensional space is given by:

$$h(\mathbf{x}|\mu, \Sigma) = \frac{1}{\sqrt{(2\pi)^D |\Sigma|}} e^{-\frac{1}{2}(\mathbf{x}-\mu)^T \Sigma^{-1} (\mathbf{x}-\mu)} \quad (13)$$

with  $\mathbf{x}$  being the  $D$ -dimensional input vector,  $\mu$  the  $D$ -dimensional mean vector, and  $\Sigma$  ( $D \times D$ ) the covariance matrix.

235 The number  $M$  of Gaussian components is an input of the model. Given this number of components, mean and covariance matrices are initialized. Then, the Expectation – Maximization algorithm is used to tune the components' parameters to maximize the likelihood. During the expectation step, the probability for each point to belong to each distribution is computed. Then the distributions' parameters are updated. These steps are repeated until the likelihood is constant.

In this study, a two-dimensional data-set composed of  $K$  grid points with 20 features is used to feed the GMM (Fig. 3). The 240 20 features are composed of the 10 first EOFs of zonal and meridional velocities.

GMM require to impose as input the number of components, i.e., the number of clusters, in the model. The optimum number of clusters can be defined through the calculation of the Bayesian information criterion (BIC) score (Schwarz, 1978):

$$\text{BIC} = -2\ln(\mathcal{L}) + G\ln(N) \quad (14)$$

245 with  $\mathcal{L}$  the maximized value of the likelihood function of the model,  $G$  the number of parameters estimated by the model, i.e. the mean and covariance matrices of the Gaussian components, and  $N$  the number of data points, i.e. the number of observations. The BIC score penalizes too complex models to avoid the over-fitting of the data-set. In this way, it limits the number of components of the GMM with the  $G\ln(N)$  term while the likelihood could be maximized with one Gaussian component per grid point.

250 The GMM procedure will find clusters of grid points that are correlated in the reduced basis. The centroids of the clusters, i.e., the point of maximum likelihood for a given cluster, are then chosen to be sensors' locations, as they are the most representative points of the clusters.

### 3.5 Scoring

255 The data-set is split into a training and testing period. The training is performed on two thirds of the data-set, composed of years 2016 and 2017, while the methods are scored on year 2018. By taking an integer number of year, the seasonality bias of weather data is limited.

Given a set of locations  $\gamma$ , the reconstruction error is equal to the root mean squared error averaged over time between the reconstructed state of the system and the true state as approximated in the reduced basis. At each time step, the measured wind speed is  $\mathbf{Y}(t)$  and the estimated coefficients on the reduced order basis are  $(\mathbf{C}_\gamma \Phi^r)^\dagger \mathbf{Y}(t)$ . Going back to the *latitude*  $\times$  *longitude* space, the zonal and meridional wind speed at every point of the grid at time  $t$  are:

$$260 \mathbf{X}^{\text{recons}}(t) = \Phi^r (\mathbf{C}_\gamma \Phi^r)^\dagger \mathbf{Y}(t) \quad (15)$$

The real wind speed from the reduced basis coefficients at time  $t$  is:

$$\mathbf{X}^{\text{real}}(t) = \Phi^r \mathbf{a}(t) \quad (16)$$

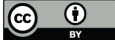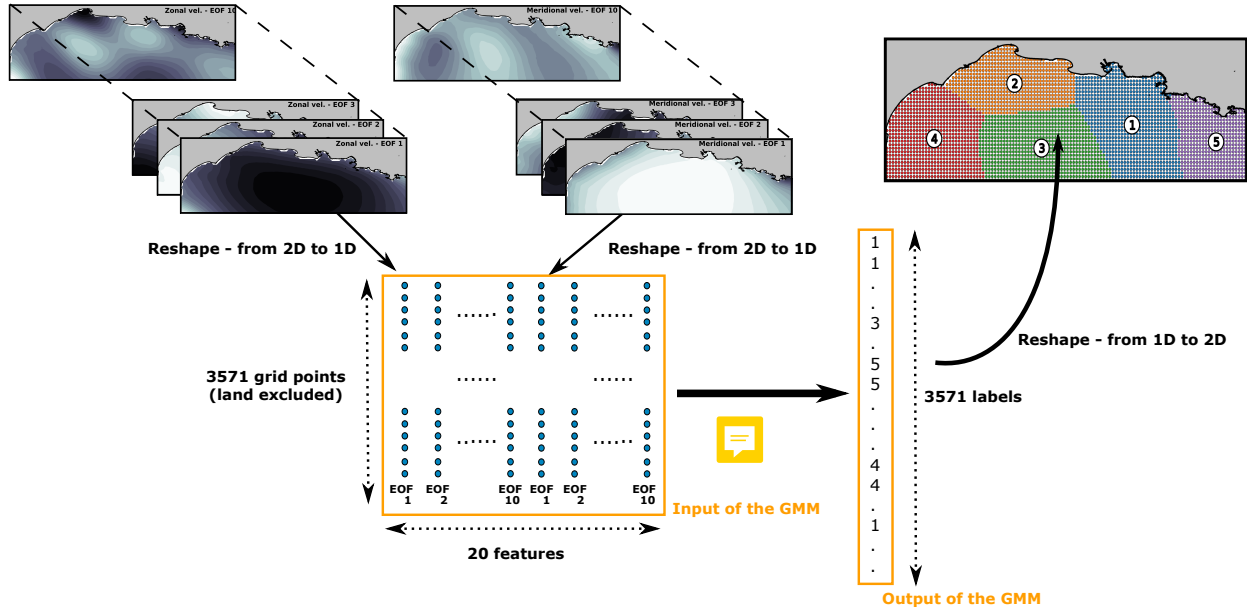

**Figure 3.** Schematic of the clustering procedure of wind data using Gaussian Mixture Models. It is illustrated for the unsupervised clustering of the Mediterranean Sea wind field.

The reconstruction error associated with the sampling matrix  $C_\gamma$  is then the temporal mean of the root mean squared error of the zonal and meridional wind speed over the full grid:

$$E_\gamma^{\text{recons}} = \frac{1}{T} \sum_{t=1}^T \sqrt{\frac{1}{2K} \sum_{i=1}^{2K} (X_{\gamma,i}^{\text{recons}}(t) - X_i^{\text{real}}(t))^2} \quad (17)$$

## 4 Results

### 4.1 Optimal number of sensors

The number of sensors to place on the grid is an input of the GMM. The BIC score gives a trade-off between the likelihood of the obtained distribution, and the complexity of the model. It is usually used to determine an optimal number of clusters for the GMM, by finding its minimum. However, there is no guarantee that there will be a minimum BIC score corresponding to an optimal number of clusters, and there is no guarantee that this number of clusters is actually optimal for the considered metric. If there is no minimum to the BIC score, one can look for an elbow in the BIC score's gradient, showing a number of clusters after which the marginal gain of BIC score is no longer significant. In this study, the BIC score showed no minimum up to 50 clusters, so its gradient was studied. However this technique is not very accurate, and the results should be interpreted carefully. For example, the knee identification is very dependant on the cut-in and cut-out of the curve for the definitions of the asymptotes. Furthermore, the GMM results are dependant on the initialization of the algorithm. As shown in Fig. 4, the

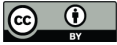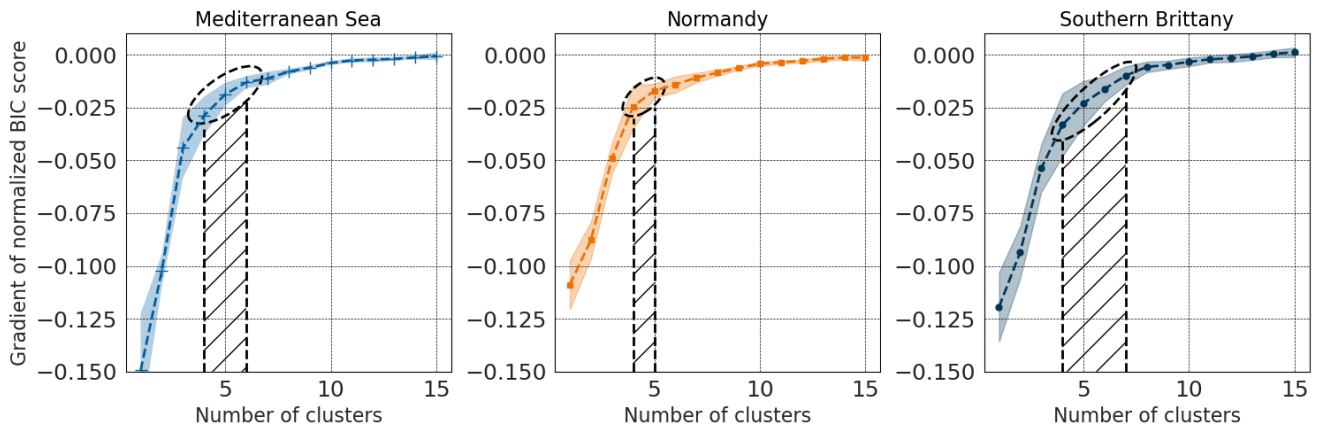

**Figure 4.** The gradient of normalized BIC score is shown for the three areas, for a number of clusters ranging from 1 to 15. The curves' envelopes are the 95% confidence interval obtained from 25 different initializations of the GMM training. The determination of an optimal number of sensors from these curves is uncertain, ranging from 4 to 6 for the Mediterranean Sea (shaded area), 4 to 5 for Normandy and 4 to 7 for Southern Brittany.

obtained optimal number of sensors can range between 4 and 7, though it shows clear convergence for a number of clusters above 10. The gradient of BIC score was computed for 20 different GMM initializations for the three areas, and the mean gradient plotted as dashed line, with its 95% confidence interval as envelope. The BIC score was normalized to compare the three areas together. Similar trends can be observed, with stronger gradients in the Mediterranean Sea for the first clusters showing a bigger underlying complexity. For Southern Brittany, the associated uncertainty is bigger, showing weaker global minimum for the Expectation Maximization.

While the BIC score gives an indication on the range of optimal number of clusters, it does not necessarily translates into equivalent reconstruction for the wind fields. Though the clustering itself might find an optimum of 5 clusters for the Mediterranean Sea, this can lead to much higher reconstruction error than for the other areas. Furthermore, the uncertainty on the optimal number of sensors shows an underlying property of this spatio-temporal data which has strong correlations between points, and for which clusters are not well separated. All in all, there is a need to cross-validate the computation of the optimal number of sensors.

It is then proposed to validate the number of sensors from the computation of the reconstruction error. Exploring the range of number of clusters obtained through the BIC score gradient, the final number of sensors is chosen using a reconstruction error threshold.

To compare the three areas which have different wind regimes, the error threshold is defined as the reconstruction error of the normalized wind (Normalized RMSE or N-RMSE). The optimal number of clusters is then computed as the minimal number of clusters required to reconstruct 75% of the map with an error lower than the threshold.

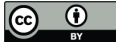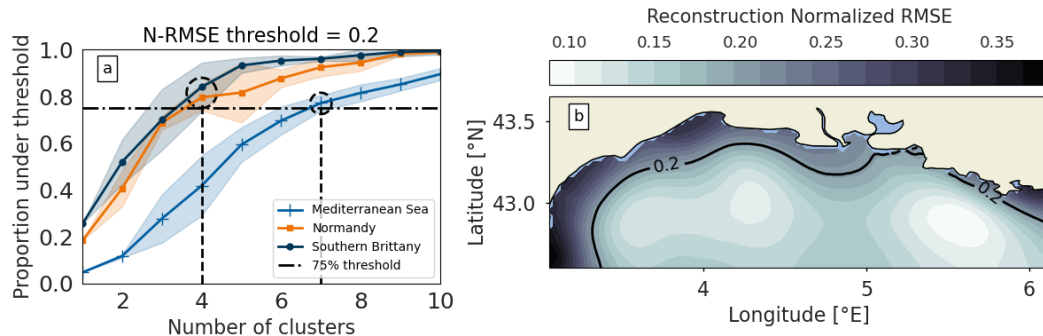

**Figure 5.** The computation of the proportion of the map under a certain error threshold for the three areas and 20 different GMM initializations allows for optimal number of sensors selection as the minimum number of sensors required to reach 75% of the map under threshold (a). The obtained reconstruction error map with the threshold contour shown illustrates the selection on the Mediterranean Sea (b).

295 It is then up to the final user to define an empirical error threshold to derive the optimal scenario. As shown in Fig. 5 (a), while the BIC score gradient curves are similar for the three areas, the normalized reconstruction error is significantly higher for the Mediterranean Sea for the same number of input points, thus necessitating a higher number of clusters to reach 75% of the map under threshold. The shown threshold is 0.2 normalized reconstruction error, yielding to coherent results with regards to the BIC score. The final number of clusters are then 4 for Normandy and Southern Brittany and 7 for the Mediterranean Sea.

300 This workflow for the definition of the optimal number of sensors ensures similar performance between the three areas.

#### 4.2 Clustering-derived sensors performance

The sensors' locations for the base case scenario with optimal number of sensors of 4 for Normandy and Southern Brittany and 7 for the Mediterranean Sea are then computed on the three areas for the four methods: Monte Carlo, QR pivoting, EOFs extrema, and GMM.

305 The obtained sensors' locations are displayed in Fig. 6 as red dots. It can be visually noted that the sensors array derived from the GMM method (second row) is more evenly distributed than the benchmark sensors arrays. QR pivots locations (third row) are concentrated near the coast or at the maps' limits, and so are EOFs extrema (fourth row). It shows how the GMM method allows for homogeneous sampling of the area, while benchmark methods tend to give too much weight to coastal and bordering points. This can be either artificial, due to spatial discontinuity at the limits of the maps, or because of the orographic impact of the coast. Indeed, the wind near the coast shows more variability, and while those points are contained in wider spatial structures in the GMM, they can be considered as salient points in the QR pivoting method or in the EOFs extrema.

The resulting reconstruction at different time steps is illustrated as background for the three areas and four methods in Fig. 6. The first row is the reference case, reconstructed with perfect knowledge on the 20 EOFs coefficients (EOFs reference). For the Mediterranean Sea, this specific time step shows a combined Mistral and Tramontane winds blowing in the Mediterranean Sea. It is a complex and standard situation with different wind regimes, strong offshore blowing winds in the North and West

315



**Table 2.** Reconstruction errors computed for the 3 areas and the 4 sampling methods, including the random scenario displayed in Fig. 6. The best performing method is displayed in bold for each area. The reconstruction error (RMSE) and the errors on the max and mean wind speed at each time step are computed.

| Area              | Method       | Max wind speed<br>RMSE [m/s] | Mean wind speed<br>RMSE [m/s] | RMSE [m/s]  |
|-------------------|--------------|------------------------------|-------------------------------|-------------|
| Mediterranean Sea | GMM          | <b>0.94</b>                  | <b>0.17</b>                   | <b>0.9</b>  |
|                   | QR pivoting  | 1.42                         | 0.42                          | 1.77        |
|                   | EOFs extrema | 1.28                         | 0.2                           | 1.37        |
|                   | Monte Carlo  | 1.28                         | 0.35                          | 1.41        |
| Normandy          | GMM          | 2.0                          | <b>0.1</b>                    | <b>0.85</b> |
|                   | QR pivoting  | 1.84                         | 0.56                          | 1.83        |
|                   | EOFs extrema | <b>0.89</b>                  | 0.42                          | 1.44        |
|                   | Monte Carlo  | 1.4                          | 0.23                          | 1.08        |
| Southern Brittany | GMM          | 1.32                         | <b>0.09</b>                   | <b>0.7</b>  |
|                   | QR pivoting  | 2.04                         | 0.29                          | 1.33        |
|                   | EOFs extrema | <b>0.89</b>                  | 0.16                          | 0.96        |
|                   | Monte Carlo  | 1.87                         | 0.17                          | 0.93        |

of the Gulf, and South-Eastern winds on the Eastern extremity. It can be noted that the GMM method correctly reproduces the intensity of those three phenomenons, while other techniques tend to overestimate or underestimate their effects.

For Normandy, the benchmark sensors array are largely off target on this specific case, predicting little to no wind offshore due to their exclusive coastal sampling, while the GMM method better captures both the coastal low winds and offshore wind  
 320 cell.

For Southern Brittany, the effects of the sensors array is less clear, possibly explained by the smaller area, or by a simpler wind regime. However, the GMM method still performs largely better in terms of reconstruction error and wind patterns than benchmark methods.

Three different metrics are computed for the optimal scenarios on the three areas, and displayed in Table 2. Along with the  
 325 reconstruction error described in Sect. 3.5, the error in the reconstructed mean and maximum wind speed are displayed. For the three areas, the GMM method clearly leads to good reconstruction error and mean wind speed estimation. However, the EOFs extrema method yields to better estimation of the maximum wind speed for Normandy and Southern Brittany. It illustrates the fact that the GMM method is good at reconstructing the synoptic situation, while discarding high variability points that can be relevant for extreme events.

330 The proposed GMM method is scored against the three baselines methods on the Mediterranean sea area, for a number of sensors ranging from 1 to 10. The results are displayed in Fig. 7, showing the great interest of the clustering derived method compared to benchmark methods for the offshore wind reconstruction from sparse sampling. QR pivoting sensors and EOFs

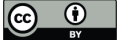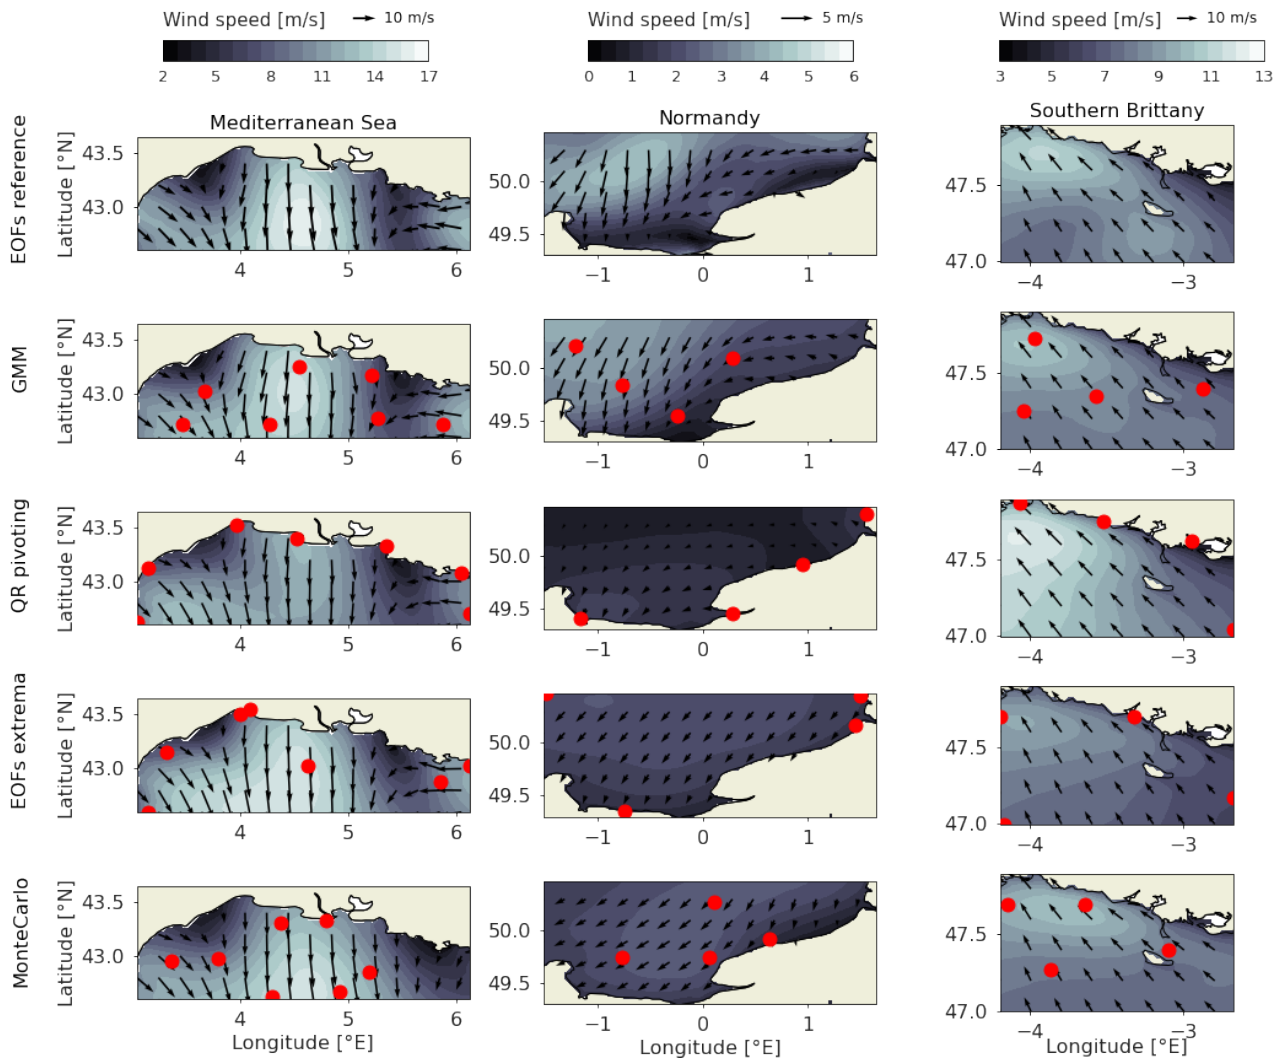

**Figure 6.** Reconstruction example for the optimal scenario on the three areas, from the reduced basis (EOFs reference), from GMM clustering (GMM), and from the 3 baselines, QR pivoting, EOFs extrema and Monte Carlo. The color grading shows the wind speed, the black arrows the wind direction, with length proportional to the wind speed, and the red dots are the locations of the sensors on the optimal scenario, with 7 sensors on the Mediterranean Sea, and 4 for Normandy and Southern Brittany.

extrema sensors fail to surpass the Monte Carlo simulation for low number of sensors. The GMM method yield to reconstruction errors systematically below the minimum of the boxplots (i.e. first quartile minus 1.5 times the inter-quartile range which is equal to 99.65 % of the data in the Gaussian case.), showing the near-optimal reconstruction. The benchmark methods' errors eventually decrease for a high number of sensors and surpass the Monte Carlo median scenario for 10 sensors. However it is



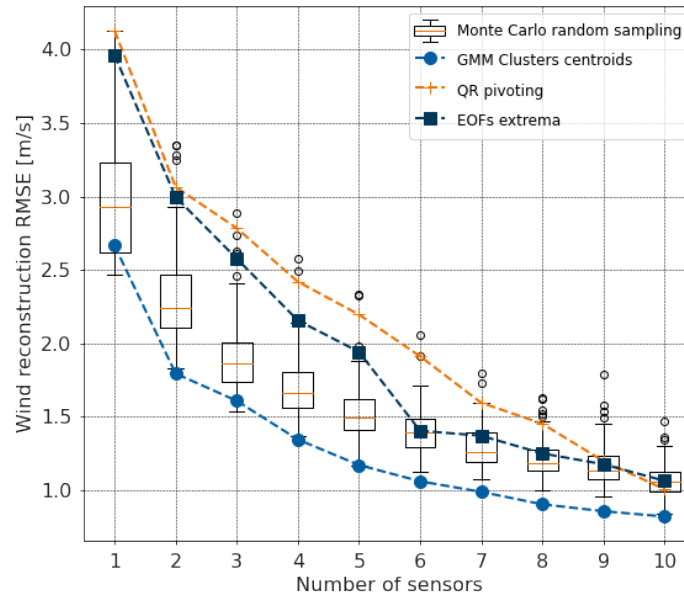

**Figure 7.** QR pivoting method (orange plus), EOFs extrema method (deep blue squares) and GMM method (blue dots) are compared to Monte Carlo simulations, displayed as boxplots in terms of wind reconstruction error.

expected that the different methods should converge for high number of sensors, as the system is more and more constrained. It is illustrated by the decreasing spread within the Monte Carlo simulation.

For the GMM curve and the Monte Carlo boxplots, the reconstruction error seems to inflect for a number of sensors around 7, cross-validating the obtained optimal number of sensors for the base scenario. It can be noted that the reconstruction error for the EOFs extrema method drastically decreases with the addition of the sixth sensor. As shown in Fig. 2, the sixth sensor is a central offshore point, while the 5 first locations are near the coast. For number of sensors above 6, the EOFs extrema method then compares to the Monte Carlo median scenario.

For low and optimal number of sensors, compared to state-of-the-art techniques, the GMM method allows for the efficient sensors placement for offshore wind reconstruction. The obtained reconstruction errors are displayed in Table 3, along with the RMSE gain relative to the Monte Carlo median score. In the three areas, the GMM method improves significantly the reconstruction error on the base case scenario by 13% for Southern Brittany, and more than 20% for Normandy and the Mediterranean Sea. The QR pivoting method proves irrelevant for this application with a 50% increase in reconstruction error in Normandy, and around 30% in Southern Brittany and the Mediterranean Sea. The extrema method is closer to the Monte Carlo median case, though above, probably thanks to the manual removal of irrelevant extrema.

To visualize the effect of the sensors' locations, and the origin of the reconstruction error, the reconstruction error is computed as the root mean square error for each grid point, and displayed for the main scenario on the three areas in Fig. 8.



**Table 3.** RMSE and RMSE percentage gain versus Monte Carlo median value for the base case scenario on the three areas, for number of clusters of 7 for the Mediterranean Sea and 4 for Normandy and Southern Brittany. The bold numbers show the best performances.

| Score                | Mediterranean Sea<br>RMSE [m/s]   % gain | Normandy<br>RMSE [m/s]   % gain | Southern Brittany<br>RMSE [m/s]   % gain |
|----------------------|------------------------------------------|---------------------------------|------------------------------------------|
| GMM                  | <b>0.99</b>   -22%                       | <b>0.90</b>   -24%              | <b>0.82</b>   -13%                       |
| QR pivoting          | 1.60   +27%                              | 1.83   +55%                     | 1.33   +39%                              |
| EOFs extrema         | 1.37   +9%                               | 1.44   +22%                     | 0.956   +0.3%                            |
| Monte Carlo (Median) | 1.26   -                                 | 1.18   -                        | 0.952   -                                |

The coastal sensors arrays from the QR pivoting method displayed in the second row do not allow for offshore wind reconstruction, as those points are strongly influenced by coastal effects. Strong reconstruction errors of more than 2 m/s are then obtained far offshore for Normandy and the Mediterranean Sea. For the EOFs extrema method displayed in the third row, where some offshore sensors' locations are present in addition to coastal ones, the synoptic wind regime seems better captured with more homogeneous reconstruction error. The reconstruction error patterns show the strong spatial correlation of the input wind data with lower reconstruction errors around the sensors' locations. However, the radius of lowered reconstruction error depends on the location. It can be noted that coastal points in QR pivoting for the Mediterranean Sea have a small radius of influence, as opposed to some offshore points in the EOFs extrema method. Coastal areas, where the wind is influenced by the coastal orography and thermodynamic effects, have lower spatial correlations or higher variability. As such, they are considered by the QR pivoting method and the extrema method as salient points. But in the end, they barely help to reconstruct the whole area's dynamics. It illustrates the importance of smart sparse sampling for the reconstruction, and the non-adequacy of QR pivots and EOFs extrema as locations for the sparse sampling in this case.

For the three areas, the GMM obtained sensors' locations are homogeneously spatially distributed, allowing for good reconstruction on the whole map, though somewhat neglecting coastal locations. The locations, as centroids of clusters, are the most representative points of maximum likelihood clusters for a given number of sensors. As such, every point of the map belonging to a certain cluster, it allows for satisfactory reconstruction on most of the map. On the other hand, the QR pivoting method and EOFs extrema method select salient points that do not necessarily correlate well with neighbouring points, hence lowering the performance for reconstruction.

The final suggested sensors' locations for the three offshore wind development areas are given in Table 4. These locations should be considered preferred locations for the deployment of floating LIDARs for wind resource assessment in the French offshore wind development areas.

## 5 Discussion

In this study, an optimal sparse sampling is proposed using a Gaussian Mixture Model on high-resolution NWP data from Meteo France's MeteoNet data-set (AROME model). The method used is simple yet efficient for the optimal sparse sampling

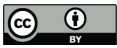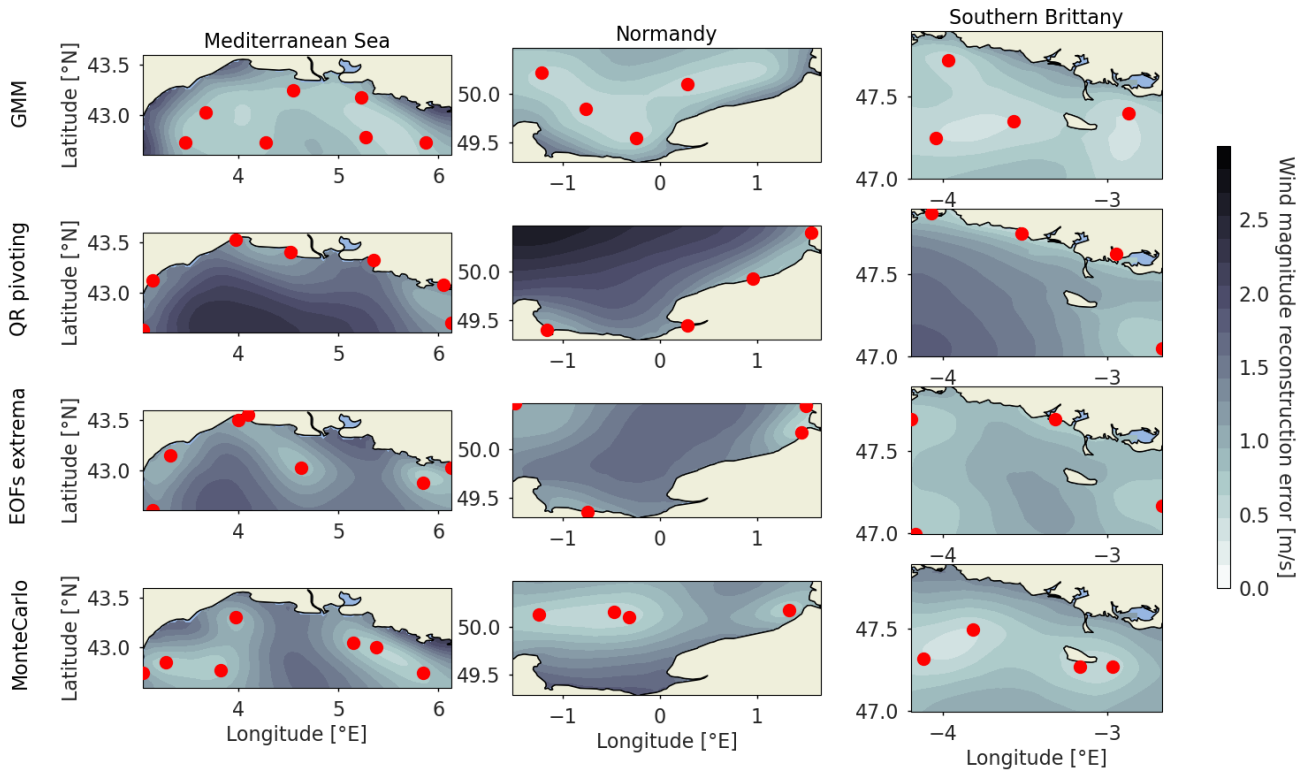

**Figure 8.** Wind magnitude reconstruction error temporally averaged per grid point on the Mediterranean Sea (left), Normandy (Center), Southern Brittany (right). The reconstruction error is computed for the optimal number of sensors determined in Sect. 4.1 using the 3 baselines and the proposed clustering method. The red dots are the grid points used as input for the least squares reconstruction.

of offshore wind field. Applied to offshore wind resource assessment, it can be a useful tool for the design of observation networks. It is compared to state-of-the-art solutions that fail to efficiently sample this specific problem, and a method is proposed to estimate the optimal number of sensors to deploy. The authors nonetheless raise attention on the following points  
 380 to interpret and discuss the obtained results.

The metric that is used to measure the performance of the sparse sampling in this paper advantages the GMM method, because its homogeneous sampling allows for a correct reconstruction of the synoptic situation. Coastal points are not well reconstructed using the GMM method, but this does not reflect on the scoring. Since the metric averages the reconstructed wind field's error over the grid points, a method that performs fairly good over the entire area is preferred.

385 As a consequence, both the obtained sensors' location and its performance are depending on the selected area. In this study, the selected sites are simple rectangles over the future development areas. But it could be interesting to reconstruct the wind



**Table 4.** Final locations selected for the deployment of floating LIDARs in French offshore wind development areas

| sensor # | Mediterranean Sea<br>(Latitude [°N], Longitude [°E]) | Normandy<br>(Latitude [°N], Longitude [°E]) | Southern Brittany<br>(Latitude [°N], Longitude [°E]) |
|----------|------------------------------------------------------|---------------------------------------------|------------------------------------------------------|
| 1        | (42.775, 5.275)                                      | (49.546, -0.242)                            | (47.721, -3.967)                                     |
| 2        | (43.25, 4.55)                                        | (50.096, 0.283)                             | (47.396, -2.867)                                     |
| 3        | (42.725, 4.275)                                      | (50.221, -1.217)                            | (47.346, -3.567)                                     |
| 4        | (42.725, 3.475)                                      | (49.846, -0.767)                            | (47.246, -4.042)                                     |
| 5        | (43.175, 5.225)                                      |                                             |                                                      |
| 6        | (43.025, 3.675)                                      |                                             |                                                      |
| 7        | (42.725, 5.875)                                      |                                             |                                                      |

field and score the performance on specific sites defined by operational limits for example bathymetry on the Mediterranean Sea, or coastal exclusion area for the three cases. This could lead to different results, and the sensitivity of the proposed method would then be studied.

390 Given the high variability of the wind near the coast and the possible impact on the obtained results, the 20 first kilometers from the coast were excluded to test the sensitivity of the methods. It turns out that it does not make the state-of-the-art methods more relevant for this application as they still tend to select bordering points as input points.

Now, in the context of the development of marine energies in French waters, not only the wind should be considered but other variables such as wave variables, physicochemical parameters (turbidity, sea surface temperature, salinity) which are important  
 395 for environmental impact monitoring. The installation of a network of sensors would therefore gain traction if optimized with regards to multiple variables. A follow-up of this work would be to include model data for each of the variables of interest, and perform the clustering on the stacked 10 first EOFs of each variable, for the design of a multi-parameters observation network.

Getting even closer to the industrial reality of the sensors' network, it would be of great interest to include a cost function dependant on the location (depth, distance from shore, other constraints). This method could be declined to find the Pareto  
 400 optimal sensors network. The optimal number of sensors would therefore become the number at which the sensors marginal cost exceeds the reconstruction gain.

The data in this study is derived from the NWP model AROME data, with a 1.3km grid size and hourly definition. The parametrisation of the model offshore is not perfect, in particular for the sea/atmosphere coupling that can lead to discrepancies in surface parameters, as shown during the Mediterranean HyMex campaign (Rainaud et al., 2016). The learnt dynamics might  
 405 then be a coarse description of the reality, and the derived sensors' locations be limited for real time wind reconstruction, since only trained on low spatio-temporal resolution patterns. The obtained locations are in this case optimal only for reconstructing the dynamics of the NWP model, and the representativeness of the used data compared to the reality needs to be questioned. It could then be of interest to run such study on higher resolution data, either from Synthetic Aperture Radar measurements or Large Eddy Simulations, though on shorter periods, or comparing the reconstruction on a set of measurements offshore.



410 Publicly available through the MeteoNet data-set, only 10 meters wind speed are used in this paper. For offshore wind application, hub height wind speed are to be considered (heavy maintenance, loading, energy production). The described method is agnostic to the input data, though it would be of interest to validate the obtained sensors network with 100m wind speed data. It is not direct that the obtained sensor network will be the same with above 100m wind speed data, since the extrapolation will be depending on the grid point and the wind speed and direction (changing the sea surface roughness). The non-linear transformation of data can then change the weight given by the clustering model at each timestep and grid point.

Seemingly, performing the clustering with the power-curve transformed data can potentially lead to different results. The study focuses on wind speed, as this can apply to wind energy production but also maintenance operations planning or wind turbine loading. A specific study could focus on wind power, applying vertical extrapolation and wind power curve. The proposed method can be easily implemented to different data inputs.

420 The used data-set compiles 3 years of data. The model is trained on 2 years and tested and scored on the third year. It could be of interest to carry the same study on a longer data-set from global reanalysis models such as ERA5. The high-resolution regional AROME model from Météo France with its 3 years of open source data from the MeteoNet data-set offers a higher number of grid point, making it more relevant for the sensor siting on small areas as the ones in this study. The features that need to be captured by the reconstruction are smaller scale than global models' grid size. Comparing the results obtained from the two sources could be of interest.

425 The used benchmark methods from the sparse-sampling literature i.e. the QR pivoting method and the EOFs extrema method do not prove efficient for the stated problem. For generalization purposes, this method would need to be compared to state-of-the-art method on benchmark data-set such as the simulated flow past a cylinder used in Manohar et al. (2018). This paper does not aim at generalizing a method, but develops an efficient solution to an identified problem, for which state-of-the-art methods seem to fail.

## 6 Conclusions

A method for the finding of an optimal sensors network for offshore wind reconstruction is presented in this paper, and applied to three of the main offshore wind energy development area in France. The sparse sensors placement problem is stated on a reduced basis of the 3 years AROME prediction of wind from the MeteoNet data-set. State-of-the-art techniques of sparse sensors placement for reconstruction (QR pivoting and extrema methods) are compared to the proposed method, based on the Gaussian Mixture Model clustering of Empirical Orthogonal Functions of zonal and meridional wind offshore. By selecting the clusters' centroids as proposed locations for sensors, the GMM method homogeneously partitions the domain into spatially correlated clusters. In this way, the reconstruction error on the whole domain is minimized, leading to a 20% decrease in wind reconstruction error compared to the median Monte Carlo case. On the other hand, state-of-the-art methods fail to reconstruct the whole wind field because they are attracted by salient points with high variability (bordering points). However, these points are not very spatially correlated to neighboring points, yielding to a reconstruction error higher than the median Monte Carlo



case. The GMM clustering method gives indications on the optimal number of sensors to deploy, though this estimation should be refined either by the integration of cost or environmental constraints, or by the definition of a reconstruction error threshold.

445 GMM clustering method seems to be a simple yet efficient solution for sparse sensors placement. Applied to offshore wind reconstruction, it allows for the optimal placement of sensors, and paves the way for smart marine monitoring in the era of offshore wind energy development. Further work should focus on the technique's generalization to benchmark problems, and question the representativeness of the used data-set. For wind energy applications, the multivariate case should be studied for multi-instrumental sensors placement, and the economic constraints should be implemented for the definition of the Pareto optimal number of sensors.

450 In the light of this study, the authors suggest the deployment of 7 sensors in the Mediterranean Sea, 4 sensors in Normandy and 4 sensors in Southern Brittany at optimal locations to reconstruct the offshore wind field and to help with the wind resource assessment on these areas.

*Code and data availability.* Meteorological data used in this study are available online through the MeteoNet data-set. The code developed within the FOWRCE-SEA consortium is not publicly accessible.

455 *Author contributions.* J-F. Filipot and M. Thiébaud identified the problematic. M. Thiébaud and P. Tandeo designed the experiment. R. Marcille carried out the experiment and performed the simulations under the supervision of M. Thiébaud and P. Tandeo. M. Thiébaud and R. Marcille developed the model code. R. Marcille prepared the manuscript with contribution from all co-authors

*Competing interests.* The authors declare that they have no conflict of interest.

460 *Acknowledgements.* This work was supported by France Energies Marines and the French government, managed by the Agence Nationale de la Recherche under the Investissements d'Avenir program, with the reference ANR-10-IEED-0006-34. This work was carried out in the framework of the FOWRCE\_SEA and POWSEIDOM projects.



## References

- Ali, N., Calaf, M., and Cal, R. B.: Clustering sparse sensor placement identification and deep learning based forecasting for wind turbine wakes, *Journal of Renewable and Sustainable Energy*, 13, 023 307, 2021.
- 465 Annoni, J., Taylor, T., Bay, C., Johnson, K., Pao, L., Fleming, P., and Dykes, K.: Sparse-sensor placement for wind farm control, in: *Journal of Physics: Conference Series*, vol. 1037, p. 032019, IOP Publishing, 2018.
- Caselton, W. F. and Zidek, J. V.: Optimal monitoring network designs, *Statistics & Probability Letters*, 2, 223–227, 1984.
- Castillo, A. and Messina, A. R.: Data-driven sensor placement for state reconstruction via POD analysis, *IET Generation, Transmission & Distribution*, 14, 656–664, 2019.
- 470 CEREMA: Eoliennes en mer en France, <https://www.eoliennesenmer.fr/>, 2022.
- Chepuri, S. P. and Leus, G.: Continuous sensor placement, *IEEE Signal Processing Letters*, 22, 544–548, 2014.
- Clark, E., Kutz, J. N., and Brunton, S. L.: Sensor Selection With Cost Constraints for Dynamically Relevant Bases, *IEEE Sensors Journal*, 20, 11 674–11 687, <https://doi.org/10.1109/JSEN.2020.2997298>, 2020.
- Cohen, K., Siegel, S., and McLaughlin, T.: Sensor Placement Based on Proper Orthogonal Decomposition Modeling of a Cylinder Wake, in: 33rd AIAA Fluid Dynamics Conference and Exhibit, vol. 4259, AIAA, <https://doi.org/10.2514/6.2003-4259>, 2003.
- 475 Courtier, P., Thépaut, J.-N., and Hollingsworth, A.: A strategy for operational implementation of 4D-Var, using an incremental approach, *Quarterly Journal of the Royal Meteorological Society*, 120, 1367–1387, 1994.
- Davis, R. E.: Predictability of sea surface temperature and sea level pressure anomalies over the North Pacific Ocean, *Journal of Physical Oceanography*, 6, 249–266, 1976.
- 480 Fukami, K., Maulik, R., Ramachandra, N., Fukagata, K., and Taira, K.: Global field reconstruction from sparse sensors with Voronoi tessellation-assisted deep learning, *Nature Machine Intelligence*, 3, 945–951, 2021.
- Gottschall, J., Gribben, B., Stein, D., and Würth, I.: Floating lidar as an advanced offshore wind speed measurement technique: current technology status and gap analysis in regard to full maturity, *WIREs Energy and Environment*, 6, e250, <https://doi.org/10.1002/wene.250>, 2017.
- 485 Hawkins, E. and Sutton, R.: Variability of the Atlantic thermohaline circulation described by three-dimensional empirical orthogonal functions, *Climate Dynamics*, 29, 745–762, 2007.
- IEA: Offshore Wind Outlook 2019, Tech. rep., IEA, <https://www.iea.org/reports/offshore-wind-outlook-2019>, 2019.
- Joshi, S. and Boyd, S.: Sensor selection via convex optimization, *IEEE Transactions on Signal Processing*, 57, 451–462, 2008.
- Krause, A., Singh, A., and Guestrin, C.: Near-optimal sensor placements in Gaussian processes: Theory, efficient algorithms and empirical studies., *Journal of Machine Learning Research*, 9, 2008.
- 490 Larvor, G., Berthomier, L., Chabot, V., Le Pape, B., Pradel, B., and Perez, L.: MeteoNet, An Open Reference Weather Dataset by Meteo-France. 2020, 2020.
- Manohar, K., Brunton, B. W., Kutz, J. N., and Brunton, S. L.: Data-Driven Sparse Sensor Placement for Reconstruction: Demonstrating the Benefits of Exploiting Known Patterns, *IEEE Control Systems Magazine*, 38, 63–86, <https://doi.org/10.1109/MCS.2018.2810460>, 2018.
- 495 Mohren, T. L., Daniel, T. L., Brunton, S. L., and Brunton, B. W.: Neural-inspired sensors enable sparse, efficient classification of spatiotemporal data, *Proceedings of the National Academy of Sciences*, 115, 10 564–10 569, 2018.
- Moore, G. W. K., Renfrew, I. A., and Pickart, R. S.: Multidecadal mobility of the North Atlantic oscillation, *Journal of Climate*, 26, 2453–2466, 2013.



- Murthy, K. S. R. and Rahi, O. P.: A comprehensive review of wind resource assessment, *Renewable and Sustainable Energy Reviews*, 72, 1320–1342, 2017.
- Powell, S., Howland, M., and Crane, J.: Optimization of Sparse Sensor Network in Wind Farms using Reinforcement Learning. PPE: Programmation pluriannuelle de l'énergie - 22-04-2020, Tech. rep., Ministère de la transition écologique et solidaire,, <https://www.ecologie.gouv.fr/programmations-pluriannuelles-lenergie-ppe>, 2020.
- Rainaud, R., Lebeau-pin Brossier, C., Ducrocq, V., Giordani, H., Nuret, M., Fourrié, N., Bouin, M.-N., Taupier-Letage, I., and Legain, D.: Characterization of air–sea exchanges over the Western Mediterranean Sea during HyMeX SOP1 using the AROME–WMED model, *Quarterly Journal of the Royal Meteorological Society*, 142, 173–187, 2016.
- Reynolds, D. A.: Gaussian mixture models., *Encyclopedia of biometrics*, 741, 659–663, 2009.
- RTE: Panorama de l'électricité renouvelable au 31 décembre 2021, Tech. rep., RTE, 2021.
- Schwarz, G.: Estimating the dimension of a model, *The annals of statistics*, pp. 461–464, 1978.
- Seity, Y., Brousseau, P., Malardel, S., Hello, G., Bénard, P., Bouttier, F., Lac, C., and Masson, V.: The AROME-France convective-scale operational model, *Monthly Weather Review*, 139, 976–991, 2011.
- Shukla, P., Skea, J., Slade, R., Al Khourdajie, A., van Diemen, R., McCollum, D., Pathak, M., Some, S., Vyas, P., Fradera, R., Belkacemi, M., Hasijaand, A. Lisboa, G., Luz, S., Malley, J., and (eds.): *Climate Change 2022: Mitigation of Climate Change. Working Group III Contribution to the IPCC Sixth Assessment Report*, Tech. rep., IPCC, Cambridge, UK and New York, NY, USA, <https://doi.org/10.1017/9781009157926>, 2022.
- Termonia, P., Fischer, C., Bazile, E., Bouyssel, F., Brozkova, R., Bénard, P., Bochenek, B., Degrauwe, D., Derková, M., Khatib, R., Hamdi, R., Mašek, J., Pottier, P., Pristov, N., Seity, Y., Smolikova, P., Španiel, O., Tudor, M., Wang, Y., and Joly, A.: The ALADIN System and its canonical model configurations AROME CY41T1 and ALARO CY40T1, *Geoscientific Model Development*, 11, 257–281, <https://doi.org/10.5194/gmd-11-257-2018>, 2018.
- Thompson, D. W. and Wallace, J. M.: Annular modes in the extratropical circulation. Part I: Month-to-month variability, *Journal of climate*, 13, 1000–1016, 2000.
- Yang, X., Venturi, D., Chen, C., Chrysostomidis, C., and Karniadakis, G. E.: EOF-based constrained sensor placement and field reconstruction from noisy ocean measurements: Application to Nantucket Sound, *Journal of Geophysical Research: Oceans*, 115, 2010.
- Yildirim, B., Chrysostomidis, C., and Karniadakis, G. E.: Efficient sensor placement for ocean measurements using low-dimensional concepts, *Ocean Modelling*, 27, 160–173, 2009.
- Zhang, Y. and Bellingham, J. G.: An efficient method of selecting ocean observing locations for capturing the leading modes and reconstructing the full field, *Journal of Geophysical Research: Oceans*, 113, 2008.
